# Supplementary material for: Synergistic effects of biochar and poultry manure improve soil water availability and drought tolerance in Ananas comosus
Source: Research Square preprint supplement (doi:10.21203/rs.3.rs-7529519/v1), 2025-11-10
Supplement: Supplementary file 1 [file b5769a36383acd3a93d13a75.docx]

**Manuscript Title:** Soil amendment with biochar and poultry manure: Implications for water availability and drought tolerance in Ananas comosus

**Supplementary Information**

| Table S1 - Fitted soil hydraulic parameters under biochar and poultry litter amended treatments. Parameter *ʅ* was set 0.5 for all treatments | | | | | | | |
| --- | --- | --- | --- | --- | --- | --- | --- |
| Treatment | Clay | Sand | θr | θs | α | n | Ksat |
|  | % | | cm3 cm-3 | | cm-1 | - | cm d-1 |
| B0P0 | 43.6 | 47.1 | 0.159 | 0.427 | 0.051 | 1.605 | 211.6 |
| B5P0 | 41.6 | 48.2 | 0.165 | 0.385 | 0.036 | 1.731 | 283.1 |
| B10P0 | 41.8 | 47.4 | 0.166 | 0.432 | 0.053 | 1.539 | 248.2 |
| B0P5 | 42.0 | 49.1 | 0.135 | 0.365 | 0.102 | 1.348 | 416.8 |
| B0P10 | 42.0 | 47.7 | 0.144 | 0.312 | 0.032 | 1.515 | 396.7 |
| B5P5 | 42.9 | 48.2 | 0.143 | 0.384 | 0.030 | 1.464 | 323.5 |
| B10P5 | 41.7 | 48.0 | 0.125 | 0.427 | 0.044 | 1.333 | 208.0 |
| B5P10 | 42.5 | 45.6 | 0.127 | 0.392 | 0.028 | 1.428 | 316.5 |
| B10P10 | 42.0 | 49.1 | 0.124 | 0.347 | 0.024 | 1.336 | 275.1 |

| Table S2 - Water content and pressure head at field capacity, limiting point, wilting point, and plant available water (RAW and TAW) obtained using the flux-based method (FBM) and traditional method (FC60) | | | | | |
| --- | --- | --- | --- | --- | --- |
| Treatment | θFC FBM | θLP FBM | θWP FBM | TAWFBM | RAWFBM |
| FBM | cm3 cm-3 | | | | |
| B0P0 | 0.264 | 0.221 | 0.180 | 0.084 (±0.009) | 0.043 (±0.009) |
| B5P0 | 0.235 | 0.198 | 0.175 | 0.061 (±0.015) | 0.037 (±0.019) |
| B10P0 | 0.277 | 0.242 | 0.192 | 0.085 (±0.008) | 0.036 (±0.002) |
| B0P5 | 0.253 | 0.216 | 0.170 | 0.083 (±0.003) | 0.036 (±0.005) |
| B0P10 | 0.214 | 0.179 | 0.157 | 0.058 (±0.017) | 0.035 (±0.010) |
| B5P5 | 0.256 | 0.205 | 0.166 | 0.090 (±0.012) | 0.052 (±0.003) |
| B10P5 | 0.305 | 0.215 | 0.166 | 0.139 (±0.012) | 0.090 (±0.003) |
| B5P10 | 0.260 | 0.188 | 0.152 | 0.108 (±0.007) | 0.071 (±0.006) |
| B10P10 | 0.256 | 0.179 | 0.154 | 0.103 (±0.021) | 0.077 (±0.008) |
| FC60 | θ60 | θLP 60 | θWP | TAW60 | RAW60 |
|  | cm3 cm-3 | | | | |
| B0P0 | 0.288 | 0.182 | 0.164 | 0.125 (±0.017) | 0.106 (±0.014) |
| B5P0 | 0.279 | 0.184 | 0.167 | 0.113 (±0.058) | 0.096 (±0.049) |
| B10P0 | 0.301 | 0.192 | 0.173 | 0.127 (±0.010) | 0.109 (±0.009) |
| B0P5 | 0.255 | 0.168 | 0.153 | 0.102 (±0.007) | 0.086 (±0.006) |
| B0P10 | 0.252 | 0.166 | 0.151 | 0.101 (±0.004) | 0.086 (±0.004) |
| B5P5 | 0.308 | 0.18 | 0.157 | 0.151 (±0.011) | 0.128 (±0.009) |
| B10P5 | 0.331 | 0.186 | 0.159 | 0.171 (±0.007) | 0.144 (±0.006) |
| B5P10 | 0.316 | 0.172 | 0.147 | 0.169 (±0.020) | 0.144 (±0.017) |
| B10P10 | 0.298 | 0.177 | 0.155 | 0.143 (±0.008) | 0.121 (±0.007) |
